1 **Evolution of a putative, host-derived endosymbiont division ring and symbiosis-induced**  
2 **proteome rearrangements in the trypanosomatid *Angomonas deanei***

3

4 Jorge Morales<sup>1\*</sup>, Georg Ehret<sup>1\*</sup>, Gereon Poschmann<sup>2</sup>, Tobias Reinicke<sup>1</sup>, Lena Kröninger<sup>1</sup>, Davide  
5 Zanini<sup>1</sup>, Rebecca Wolters<sup>1,3</sup>, Dhevi Kalyanaraman<sup>1,4</sup>, Michael Krakovka<sup>1,5</sup>, Kai Stühler<sup>2,6</sup>, and Eva  
6 C. M. Nowack<sup>1,#</sup>

7

8 **Affiliations:** <sup>1</sup>Department of Biology, Heinrich Heine University Düsseldorf, 40225 Düsseldorf,  
9 Germany; <sup>2</sup>Institute of Molecular Medicine, Proteome Research, Medical Faculty and University  
10 Hospital, Heinrich Heine University Düsseldorf, Düsseldorf 40225, Germany; <sup>3</sup>School of Molecular  
11 Science, The University of Western Australia, Perth, Western Australia, Australia; <sup>4</sup>Institute for  
12 Evolution and Biodiversity, University of Münster, 48149 Münster, Germany; <sup>5</sup>Institute of Cell  
13 Dynamics and Imaging, University of Münster, 48149 Münster, Germany; <sup>6</sup>Molecular Proteomics  
14 Laboratory, Biological and Medical Research Centre (BMFZ), Heinrich Heine University  
15 Düsseldorf, Düsseldorf 40225, Germany

16

17 \*Authors contributed equally

18 #Correspondence to Eva C. M. Nowack (e.nowack@hhu.de)

19

20 **The transformation of endosymbiotic bacteria into genetically integrated organelles was**  
21 **central to eukaryote evolution. During organellogenesis, control over endosymbiont**  
22 **division, proteome composition, and physiology largely shifted from the endosymbiont to**  
23 **the host cell nucleus. However, to understand the order and timing of events underpinning**  
24 **organellogenesis novel model systems are required. The trypanosomatid *Angomonas***  
25 ***deanei* contains a  $\beta$ -proteobacterial endosymbiont that divides synchronously with the**  
26 **host<sup>1</sup>, contributes essential metabolites to host cell metabolism<sup>2-5</sup>, and transferred one**  
27 **bacterial gene [encoding an ornithine cyclodeaminase (OCD)] to the nucleus<sup>2</sup>. However,**  
28 **the molecular mechanisms mediating the intricate host/symbiont interactions are largely**  
29 **unexplored. Here we identified seven nucleus-encoded proteins by protein mass**  
30 **spectrometry that are targeted to the endosymbiont. Expression of fluorescent fusion**  
31 **proteins revealed recruitment of these proteins to specific sites within the endosymbiont**  
32 **including its cytoplasm and a ring-shaped structure surrounding its division site. This**  
33 **structure remarkably resembles in shape and predicted functions mitochondrial and**  
34 **plastid division machineries. The endosymbiotic gene transfer-derived OCD localizes to**  
35 **glycosomes instead of being retargeted to the endosymbiont. Hence, scrutiny of protein**  
36 **re-localization patterns that are induced by endosymbiosis, yielded profound insights into**  
37 **how an endosymbiotic relationship can stabilize and deepen over time far beyond the level**  
38 **of metabolite exchange.**

39 Besides the ancient endosymbiotic events that initiated the evolution of mitochondria and  
40 plastids more than one billion years ago, diverse bacterial lineages have evolved intimate  
41 endosymbiotic associations with eukaryotic hosts, often involving vertical endosymbiont  
42 transmission from one host generation to the next<sup>6-8</sup>. Similar to how eukaryotes control organelle  
43 abundance, a few protist hosts have additionally evolved the ability to strictly control the number  
44 of endosymbionts per host cell<sup>1,9,10</sup>. Over time, permanent host association results in gene losses  
45 and size reduction of endosymbiont genomes<sup>11,12</sup>. In these cases, the holobiont appears to rely  
46 on chimeric metabolic pathways involving enzymes encoded in both the endosymbiont and host  
47 genomes<sup>2,13-16</sup>. However, the molecular mechanisms enabling cross-compartment linkage of  
48 metabolic pathways, synchronization of host and endosymbiont cell cycles, and controlled  
49 segregation of endosymbionts to the daughter cells are largely unknown.

50 The most critical step in endosymbiont-to-organelle conversion supposedly is the  
51 evolution of a dedicated protein translocation system that enables the import of nucleus-encoded  
52 proteins into the endosymbiont<sup>17</sup>. The cases of the cercozoan amoeba *Paulinella* where hundreds

53 of nucleus-encoded proteins are imported into the cyanobacterial endosymbiont<sup>18</sup>, and mealybug  
54 insects where peptidoglycan (PG) biosynthesis in the innermost of two nested bacterial  
55 endosymbionts depends on the import of a nucleus-encoded D-Ala-D-Ala ligase<sup>19</sup>, suggest that  
56 organogenesis events are not restricted to mitochondria and plastids but can occur in more  
57 recently established endosymbiotic associations too. Also, in a few other systems with vertically  
58 transmitted bacterial endosymbionts, there are scattered reports on single host proteins that  
59 translocate into the endosymbiont cytoplasm<sup>20,21</sup>. Deciphering the rules that lead to the evolution  
60 of host control over a bacterial endosymbiont and endosymbiont-to-organelle transition would  
61 depend on the comprehensive proteomic characterization of further endosymbiotic associations  
62 and the development of efficient genetically tractable model systems for endosymbiosis.

63 The trypanosomatid *A. deanei* (subfamily Strigomonadinae) is an emerging model system  
64 to study endosymbiosis<sup>22,23</sup>. All members of the Strigomonadinae carry a  $\beta$ -proteobacterial  
65 endosymbiont (family Alcaligenaceae)<sup>23,24</sup>. *Candidatus* Kinetoplastibacterium crithidii, the  
66 endosymbiont of *A. deanei*, lies surrounded by a bacterial inner and outer membrane and a  
67 reduced PG layer free in the host cytosol<sup>25</sup>. Strict synchronization of the host and endosymbiont  
68 cell cycles results in a single endosymbiont per daughter cell after cell division<sup>1</sup>. The  
69 endosymbiont genome (0.8 Mbp) is highly streamlined and lost most genes for the core energy  
70 metabolism as well as the biosynthetic capacity for amino acids and cofactors such as proline,  
71 cysteine, and biotin; other biosynthetic pathways (e.g., for aromatic amino acids, riboflavin, and  
72 heme) were retained and apparently contribute to the host metabolism<sup>2,5,26,27</sup>. To enable scrutiny  
73 of host/endosymbiont interactions, we previously developed genetic tools for *A. deanei* that allow  
74 for transgene expression and targeted gene knock-outs<sup>28</sup>. Furthermore, we identified one  
75 nucleus-encoded protein of unknown function, termed endosymbiont-targeted protein 1 (ETP1),  
76 that specifically localizes to the endosymbiont<sup>28</sup>, suggesting that protein targeting to the  
77 endosymbiont plays a role in host/endosymbiont interaction.

78 To determine the extent of protein import into *Ca. K. crithidii*, we analyzed proteins  
79 extracted from isolated endosymbionts (ES samples) (**Fig. 1a-b**) and whole cell lysates (WC  
80 samples) by liquid chromatography coupled to tandem mass spectrometry (LC-MS/MS). Two  
81 independent proteomic analyses totaling 9 biological replicates detected with high confidence  
82 overall 573 and 638 endosymbiont-encoded proteins (i.e., 78% and 87% of the 730 predicted  
83 endosymbiont-encoded proteins<sup>26</sup>) and 2,646 and 2,175 host-encoded proteins, respectively  
84 (**Supplementary Table S1**). Proteins identified exclusively or appearing enriched in ES samples  
85 comprised not only endosymbiont-encoded but also several host-encoded proteins (**Fig. 1c-d**).

86 Host-encoded proteins that either showed significant enrichment in the endosymbiont  
87 fraction in both experiments (red crosses in **Fig. 1c-d**) or showed significant enrichment in one  
88 experiment but were not detected at all or showed only nonsignificant enrichment in the  
89 endosymbiont fraction in the other experiment (orange crosses in **Fig. 1c-d**) were considered as  
90 putative endosymbiont-targeted proteins (ETPs). This group of 14 putative ETPs (for details see  
91 **Table S2**) also contained the previously identified ETP<sup>28</sup>. Nucleus-encoded proteins that  
92 appeared as endosymbiont-enriched in one experiment but as host-enriched in the other  
93 experiment (yellow crosses in **Fig. 1c-d**) contained several predicted glycosomal or mitochondrial  
94 proteins. Thus, this group of proteins was regarded as putative contaminants and not further  
95 analyzed.

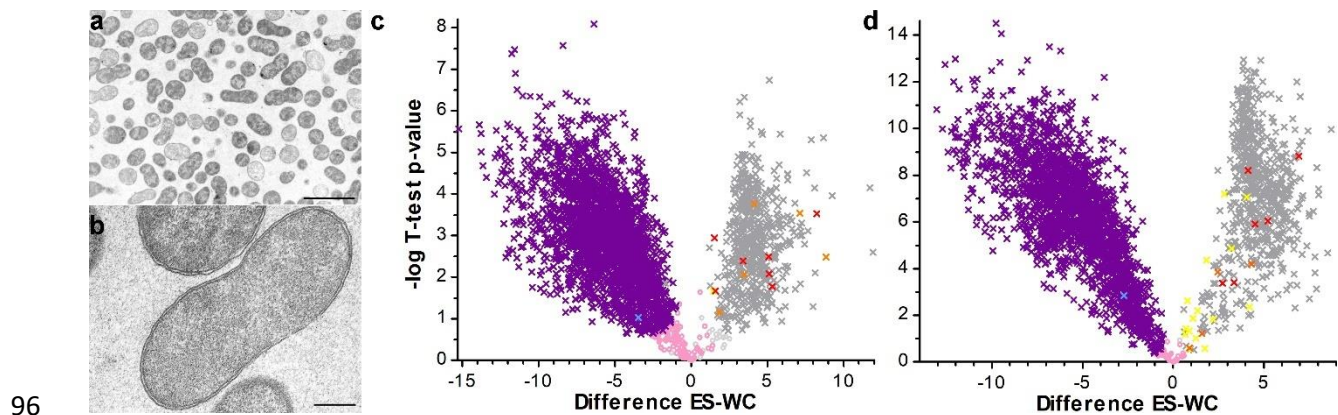

97 **Fig. 1: Comparative proteome analysis of whole cell lysates (WC) versus purified**  
98 **endosymbionts (ES) of *A. deanei*.** (a-b) Transmission electron microscopy (TEM) of *Ca. K.*  
99 *crithidii*. (a) Overview of the collected endosymbiont fraction. Most of the structures observed in  
100 this fraction consist of eight-shaped and round structures that are surrounded by a double  
101 membrane consistent with the endosymbiont. Scale bar: 2.5 μm. (b) The endosymbiont outer and  
102 inner membrane remained intact in most of the cells during isolation. Scale bar: 250 nm. (c, d)  
103 Volcano plots of proteins identified by LC-MS/MS in Experiment 1 (c) and Experiment 2 (d). The  
104 difference of intensities of individual proteins between WC and ES samples ( $\log_2(\text{norm Int}_{ES}) -$   
105  $\log_2(\text{norm Int}_{WC})$ ; Difference ES-WC) is plotted against significance ( $-\log_{10}$  p-value in Student's  
106 T-test) for proteins detected in ES or WC samples. Color code: grey, endosymbiont-encoded  
107 proteins; colorful, nucleus-encoded proteins (red, enriched in endosymbiont in both experiments;  
108 orange, enriched in ES samples in one experiment, not identified in the other experiment; yellow,  
109 enriched in ES samples in one experiment, but depleted in the other experiment; blue, the  
110 endosymbiotic gene transfer (EGT)-derived OCD; purple, remaining nucleus-encoded proteins).  
111 Crosses in bright colors, significant enrichment or depletion; circles in pale colors represent  
112 nonsignificant values (rose, nucleus-encoded; light grey, endosymbiont-encoded).

113

114           Next, we aimed to determine the subcellular localization of each of the 13 newly identified  
115 candidate ETPs in *A. deanei* using recombinant reporter protein fusions. We have previously  
116 demonstrated that ETP1 N- or C-terminally fused to the green fluorescent protein eGFP localized  
117 specifically to *Ca. K. crithidii*<sup>28</sup>. Therefore, a cell line background expressing ETP1 fused to the C-  
118 terminus of the red fluorescent protein mSCARLET (mS-ETP1) as an endosymbiont marker, was  
119 used for co-expression of the remaining 13 proteins of interest (POI) fused to the C- or N-terminus  
120 of eGFP (eGFP-POI and POI-eGFP, respectively). Western blot analyses of whole cell lysates  
121 and purified endosymbionts (up to the percoll step) obtained from the 13 cell lines co-expressing  
122 mS-ETP1 and each one of the eGFP-POI constructs showed that recombinant ETP1, ETP2,  
123 ETP3, ETP5, ETP7, and ETP8 are enriched in the endosymbiont fraction while recombinant ETP9  
124 co-purifies to a certain extent with the endosymbiont (**Fig. 2a**). For the remaining candidate ETPs  
125 neither N-terminal nor C-terminal fusion constructs showed a signal in the endosymbiont fraction  
126 or (for one protein) no signal in the Western blot at all (**Supplementary Fig. 1**). Hence, these  
127 proteins were excluded from further analyses.

128           Localization of ETP2, ETP3, ETP5, ETP7, ETP8, and ETP9 at the endosymbiont was  
129 further confirmed by epifluorescence microscopy (**Fig. 2b**). Interestingly, the various ETPs  
130 localize to specific sites within the endosymbiont. Recombinant ETP2, ETP7, and ETP9 localize  
131 specifically at the constriction site of the eight-shaped endosymbiont; ETP5 localizes to the  
132 endosymbiont and the host cell flagellar pocket; ETP3 and ETP8 show a diffuse eGFP signal over  
133 the endosymbiont and additionally in a defined dot-like structure near the host cell nucleus (**Fig.**  
134 **2b**). As previously observed for ETP1<sup>28</sup>, shifting the eGFP-tag to the C-terminal end of the ETPs  
135 did not affect the localization of ETP2, ETP5, ETP7, ETP8, and ETP9; only ETP3-eGFP did not  
136 yield a green fluorescence signal (**Supplementary Fig. 2**).

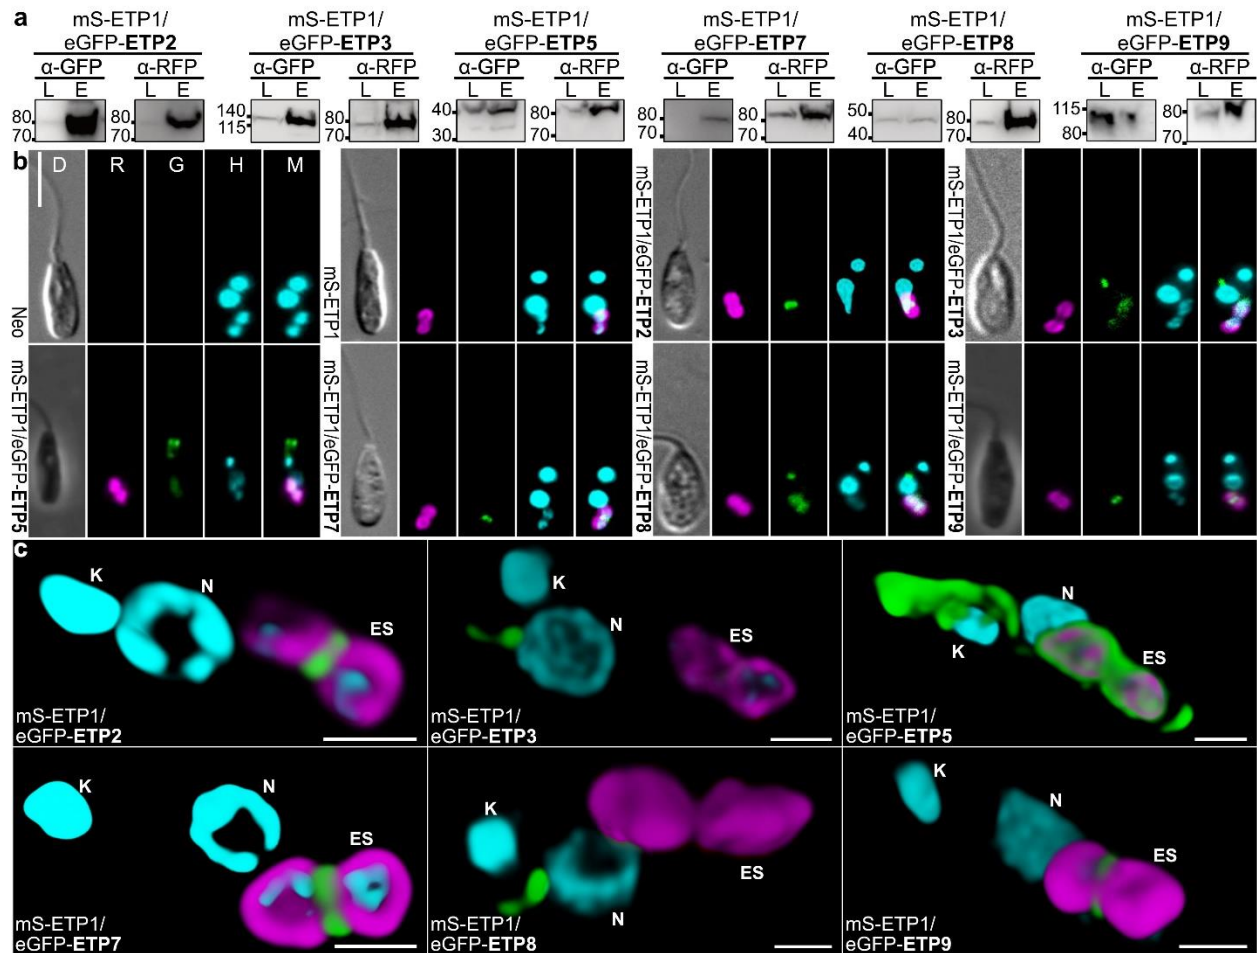

137

138 **Fig. 2: Newly identified ETPs show distinct subcellular localizations within *Ca. K. crithidii***  
 139 **and the host cell.** (a) protein from whole cell lysate (L) or purified endosymbionts (E) were  
 140 resolved by SDS-PAGE, transferred onto PVDF-membranes, and recombinant proteins  
 141 visualized by Western blot analysis using anti-GFP ( $\alpha$ -GFP) or anti-RFP ( $\alpha$ -RFP) antibodies. (b)  
 142 Epifluorescence microscopic analysis of cell lines expressing the neomycin phosphotransferase  
 143 (Neo) alone, mS-ETP1, or mS-ETP1 in combination with eGFP-POI constructs. D, differential  
 144 interference contrast; R, red channel; G, green channel; H, blue channel visualizing Hoechst  
 145 33342 staining; M, merge of the three fluorescence channels. Scale bar is 5  $\mu$ m. (c) Three-  
 146 dimensional reconstruction of the localization of the different recombinant ETPs within *A. deanei*  
 147 from the superposition of 12-32 Z-stacks after deconvolution. Color code: magenta, mS-ETP1;  
 148 green, eGFP-POI; cyan, Hoechst33342. Scale bar is 1  $\mu$ m. ES, endosymbiont; K, kinetoplast; N,  
 149 nucleus.

150

151 3D reconstruction of the fluorescence signal of each recombinant ETP obtained from focal  
 152 planes of confocal fluorescence microscopy (Fig. 2c and **Supplementary Movies 1-6**) revealed

153 that ETP1 is confined to the endosymbiont envelope; ETP2, ETP7, and ETP9 form a ring-shaped  
154 structure around the constriction site of the endosymbiont (i.e., the site where endosymbiont  
155 division occurs); ETP5 localizes at the host cell flagellar pocket from where thin fiber-like  
156 projections surround the periphery of the endosymbiont and seem to associate with the  
157 kinetoplast and nucleus of the host cell. ETP3 and ETP8 apparently localize inside the  
158 endosymbiont, indicating that these proteins translocate across the endosymbiont envelope  
159 membranes. Interestingly, ETP3 and ETP8 are additionally found in a barbell-shaped structure  
160 that sits on the anterior side of the nucleus. This structure is very similar in shape and positioning  
161 to the Golgi apparatus of *Trypanosoma brucei* and *Leishmania donovani*<sup>29,30</sup>. The Golgi is the  
162 main hub of vesicular trafficking in eukaryotic cells and, in different endosymbiotic associations,  
163 nucleus-encoded, endosymbiont-targeted proteins traffic through the Golgi<sup>21,31-33</sup>. However, an  
164 important difference in these associations is that the outermost membrane surrounding the  
165 endosymbiont is host-derived. Nevertheless, vesicles that appear to fuse with the outer  
166 endosymbiont membrane have been observed before in electron micrographs of  
167 Strigomonadinae<sup>34</sup>, raising the possibility that Golgi-derived vesicles can target *Ca. K. crithidii* in  
168 *A. deanei*. However, none of the ETPs contain a predicted targeting signal for the secretory  
169 pathway (nor the mitochondrion), all are soluble, and comparison of the ETP protein sequences  
170 among each other did not reveal any obvious common characteristics such as similar sequence  
171 extensions that could serve as targeting signals or common motifs (as analyzed by MEME 5.0.5  
172 <sup>35</sup>; cut-off: e-value <0.05).

173 To explore the cellular functions of the ETPs, we aimed to generate null mutants of ETP1,  
174 ETP2, and ETP7. However, whereas heterozygous knock-out mutants could be obtained, deletion  
175 of both alleles of the corresponding genes did not yield viable clones in all cases after several  
176 attempts. The inability to generate homozygous knock-out mutants is suggesting an essential  
177 function of these proteins. Since no inducible gene expression systems are available yet for *A.*  
178 *deanei*, a functional characterization of these genes is yet to come. Nevertheless, for several  
179 ETPs, observed subcellular localizations and functional annotations (**Table 1**) imply their  
180 involvement in distinct cellular processes.

181

182 **Table 1: Endosymbiont-targeted proteins in *A. deanei*.**

| ETP  | Annotation                                                                                                    | Best Blastp Hit <sup>a</sup>                                                             | e-value | %id <sup>b</sup> | BBH <sup>c</sup> |
|------|---------------------------------------------------------------------------------------------------------------|------------------------------------------------------------------------------------------|---------|------------------|------------------|
| ETP1 | Hypothetical protein, cons.                                                                                   | -                                                                                        | -       | -                | -                |
| ETP2 | Hypothetical protein, cons.                                                                                   | -                                                                                        | -       | -                | -                |
| ETP3 | Hypothetical protein, cons.                                                                                   | hypothetical protein<br>JIQ42_00906 [ <i>Leishmania</i> sp.<br>Namibia]                  | 2e-19   | 26               | No               |
| ETP5 | Kinetoplastid membrane protein<br>11, put.                                                                    | kinetoplastid membrane protein<br>KMP-11 [ <i>Trypanosoma cruzi</i><br>strain CL Brener] | 7e-52   | 94               | Yes              |
| ETP7 | Phage tail lysozyme, put.                                                                                     | -                                                                                        | -       | -                | -                |
| ETP8 | Hypothetical protein, cons.                                                                                   | unnamed protein product<br>[ <i>Phytomonas</i> sp. isolate EM1]                          | 3e-12   | 28               | Yes              |
| ETP9 | Dynamain family/Dynamain central<br>region/Dynamain GTPase effector<br>domain containing protein,<br>putative | unnamed protein product<br>[ <i>Trypanosoma congolense</i><br>IL3000]                    | 1e-114  | 34               | No               |

183  
184 <sup>a</sup> Protein with the lowest e-value (outside *A. deanei*) returned by Blastp against the NCBI nr  
185 database as of July 14, 2021 (e-value cut-off of 1e-6).

186 <sup>b</sup> Percentage of amino acid identity between best Blastp hit and the corresponding ETP.

187 <sup>c</sup> Best bidirectional blast hits obtained between the NCBI nr database and an in-house database  
188 containing the previously generated *A. deanei* transcriptome.

189

190 The ring-shaped arrangement of ETP2, ETP7, and ETP9 around the endosymbiont  
191 division site, is suggestive of a function in endosymbiont division. For all three recombinant  
192 proteins, this ring structure is seen in only around half of the cells in a mid-log phase culture  
193 (**Supplementary Fig. 3a**). *Ca. K. crithidii* encodes FtsZ, a GTPase that typically self-assembles  
194 into a ring structure at the inner side of the cytoplasmic membrane at bacterial division sites  
195 initiating cytokinesis, and the Min system which is typically involved in positioning the FtsZ ring<sup>36</sup>.  
196 However, antibodies specific against FtsZ distribute evenly throughout the cell instead of  
197 localizing to a division ring<sup>37</sup>, suggesting that the bacterial division machinery might not be fully  
198 functional in *Ca. K. crithidii*. Furthermore, exposure of *A. deanei* to the eukaryotic translation  
199 inhibitor cycloheximide not only results in cessation of host cell growth but also blocks  
200 endosymbiont division<sup>38</sup>, suggesting the involvement of host-derived factors in endosymbiont  
201 division. Intriguingly, ETP9 is annotated as 'dynamain family protein'. Members of the dynamain  
202 family are self-assembling, polymer-forming GTPases that are involved in diverse cellular  
203 membrane remodeling events. In the Opisthokonta, three dynamain-related proteins (DRPs) are  
204 involved in the dynamic fission and fusion of mitochondria<sup>39</sup>. Assembly of the soluble cytosolic  
205 DRP, DNM1/DRP1 (in yeast/human), into helical oligomers on the mitochondrial membrane and  
206 constriction upon GTP hydrolysis leads to mitochondrial fission<sup>40,41</sup>. Trypanosomatids outside the  
207 Strigomonadinae encode only a single DRP (or, in *T. brucei*, two nearly identical, functionally  
208 likely equal, tandemly duplicated DRPs)<sup>42,43</sup>. This 'dynamain-like protein of *T. brucei*' (TbDLP)



209 shows high homology to DNM1 in yeast and was shown to regulate mitochondrion division as  
210 well as endocytosis<sup>42,43</sup>. Interestingly, in *A. deanei* there are two divergent DLPs, AdDLP  
211 (CAD2218610.1) and ETP9 (CAD2212698.1). AdDLP shows 68% identity to TbDLP; ETP9  
212 contains the N-terminal GTPase and C-terminal GTPase effector domain typical for DRPs but  
213 shares only 34% identity with TbDLP (**Supplementary Fig. 3b**). The *etp9* gene might have  
214 evolved by duplication and divergence of *Addlp* but localizes on a different chromosome. Similarly,  
215 also in the Archaeplastida which acquired a cyanobacterial endosymbiont that evolved into the  
216 plastid, a plant-specific dynamin evolved -likely by duplication and divergence of a DRP involved  
217 in cytokinesis<sup>44</sup>. Upon plastid division, this plant-specific dynamin is recruited to the plastid division  
218 site and forms a constriction ring on the cytosolic surface of the outer membrane that seems to  
219 aid with constriction and mediates the final fission of the plastid<sup>45</sup>.

220 ETP7 is annotated as 'phage tale lysozyme'. Phyre2<sup>46</sup> predicts with 92.6% confidence  
221 structural homology of the C-terminal part of ETP7 (aa 358-518) with a cell wall degrading enzyme  
222 in the bacteriophage  $\phi$ 29 tail<sup>47</sup>. Although sequence identity is only 24% between both proteins,  
223 catalytic site and PG-binding site seem to be conserved in ETP7. Intriguingly, PG hydrolysis by a  
224 nucleus-encoded enzyme that localizes at the plastid division site is essential also for plastid  
225 division in the Glaucophyte algae that possess a PG layer between the two envelope membranes  
226 and at least in some basally branching Viridiplantae<sup>48</sup>. This finding suggests that during the early  
227 stages of plastid evolution, the ancestral algae regulated plastid division by PG splitting by a  
228 nucleus-encoded enzyme.

229 The function of ETP2, that shows neither amino acid sequence nor structural homology to  
230 known proteins and is predicted to be mainly unstructured, remains unclear. However, its  
231 apparent arrangement in the putative endosymbiont division ring suggests its involvement in  
232 symbiont division. Also the plastid and mitochondrial division machinery contain besides dynamin-  
233 related proteins and (sometimes) PG hydrolases other proteins. These have various functions,  
234 such as recruitment of soluble factors to the organelle membranes or cross-membrane linkage of  
235 the bacterium-derived and host-derived components of the organelle division machinery<sup>49-51</sup>.

236 ETP5 shows high sequence identity (94%) to the 'kinetoplastid membrane protein 11'  
237 (KMP-11) of *T. cruzi* which is highly conserved across trypanosomatids<sup>52</sup>. As in other  
238 trypanosomatids, ETP5 is encoded by a multicopy gene and occurs in four tandemly arranged  
239 identical gene copies. In *T. brucei*, *T. cruzi*, and *Leishmania infantum*, KMP-11 localizes to the  
240 basal body, flagellar pocket, and flagellum<sup>53,54</sup>, and associates with microtubules<sup>55</sup>. Although its  
241 exact cellular function is unknown, its depletion blocks cytokinesis in *T. brucei*<sup>56</sup>. The localization

242 of ETP5 suggests that in *A. deanei* there is a host-derived structure that connects the three DNA-  
243 containing compartments (nucleus, mitochondrion, and endosymbiont) with the basal body. ETP5  
244 likely interacts with these three compartments by direct interaction with the lipids present in their  
245 outer membranes<sup>57</sup>. Importantly, in trypanosomes, division of the basal body marks the transition  
246 from the G phase to the S phase in the cell cycle<sup>58</sup>. The basal body is physically linked to the  
247 kinetoplast through the tripartite attachment complex facilitating positioning and segregation of  
248 the replicated mitochondrial genome<sup>59</sup>. Thus, the observed localization of recombinant ETP5 in  
249 *A. deanei*, in combination with the cytokinesis defects following the silencing of the ETP5 ortholog  
250 KMP-11 in *T. brucei*<sup>56</sup>, suggests that ETP5 plays a role in orchestrating segregation of organelles  
251 and cellular structures during cytokinesis.

252 ETP1, ETP3, and ETP8 are annotated as hypothetical proteins. Blastp searches against  
253 the NCBI non-redundant (nr) database returned either no similar proteins from other organisms  
254 (for ETP1) or exclusively proteins of unknown function for ETP3 and ETP8 (**Table 1**). 3D structure  
255 prediction using Phyre2 revealed either no significant similarities to any known protein structures  
256 (for ETP1 and ETP8) or, with confidence levels >96%, similarity to several long stretched  $\alpha$ -helical  
257 proteins with diverse functions such as muscle contraction, PG hydrolysis, or chromosome  
258 maintenance. Hence, predicting the cellular function of these proteins is impossible based on the  
259 data at hand.

260 Finally, the EGT-derived OCD (blue cross in **Fig. 1c,d**) was not among the candidate  
261 ETPs. Examination of the OCD amino acid sequence revealed that following EGT, the protein  
262 acquired a C-terminal peroxisomal targeting sequence type 1 (PTS1) in all members of the  
263 Strigomonadinae (**Fig. 3a**), suggesting that the protein localizes to the glycosome, a specialized  
264 peroxisome in trypanosomatids characterized by the presence of the first six or seven steps of  
265 glycolysis. Interestingly, glycosomes closely associate with the endosymbiont in the  
266 Strigomonadinae<sup>22,60</sup> (**Fig. 3b**). Expression of a recombinant protein in which the OCD was fused  
267 to the C-terminus of eGFP (eGFP-OCD) in the background of a cell line expressing the  
268 glycosome-targeted red fluorescent protein mCHERRY-SKL, showed clear co-localization of  
269 eGFP-OCD with mCHERRY-SKL in epifluorescence microscopy confirming a glycosomal  
270 localization of the recombinant OCD (**Fig. 3d**). The OCD catalyzes the conversion of ornithine to  
271 proline. Ornithine can be formed in the glycosome by the activity of the arginase, which also  
272 contains a PTS1 and is localized in the glycosomes in *Leishmania* spp.. Thus, re-localization of  
273 the OCD to the glycosome likely results in proline production within the glycosome. Since *Ca. K.*  
274 *crithidii* lost the ability to generate proline, which is required for protein biosynthesis in the

275 endosymbiont, the observed close proximity of the endosymbiont to proline-generating  
 276 glycosomes might support the metabolic integration of the endosymbiont in *A. deanei* (Fig. 3c).

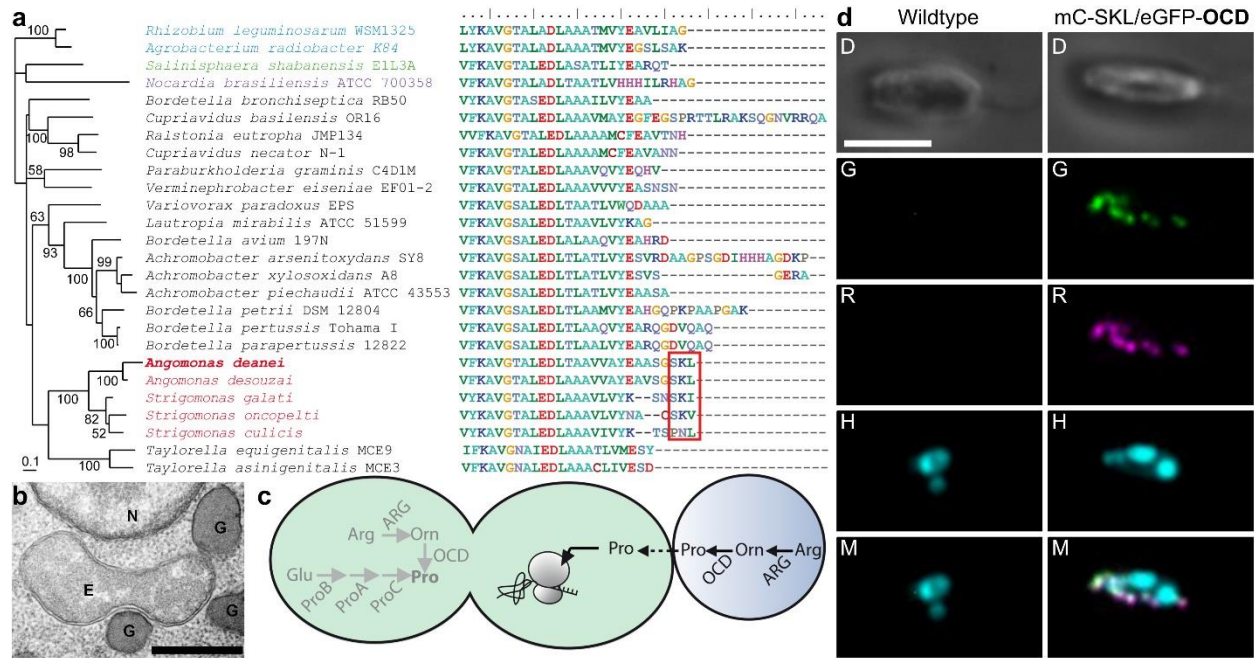

277

278 **Fig. 3: The EGT-derived OCD in the Strigomonadinae acquired a PTS1 signal and localizes**  
 279 **to the glycosome. (a)** Left, maximum likelihood phylogeny of the OCD of bacteria and the  
 280 Strigomonadinae (taxon sampling according to ref.<sup>2</sup>). Species names are colored according to  
 281 taxonomic affiliation. Red, Strigomonadinae; black,  $\beta$ -proteobacteria; green,  $\gamma$ -proteobacteria; blue,  
 282  $\alpha$ -proteobacteria; violet, actinobacteria. Values at branches represent bootstrap support >50%.  
 283 Right, alignment of the C-termini of the corresponding proteins. Red box, PTS1. **(b)** TEM of *A.*  
 284 *deanei* shows *Ca. K. crithidii* surrounded by several glycosomes. E, endosymbiont; G, glycosome;  
 285 N, nucleus; scale bar is 500 nm. **(c)** Scheme of proline metabolism in *A. deanei*. Endosymbiont,  
 286 green; glycosome, blue. Arrows in grey represent enzymes missing from the endosymbiont  
 287 genome; arrows in black, enzymes encoded in the nuclear genome. Dashed arrow represents  
 288 metabolite transport. ARG, arginase (EC:3.5.3.1); OCD, ornithine cyclodeaminase (EC:4.3.1.12);  
 289 ProB, glutamate 5-kinase (EC:2.7.2.11); ProA, glutamate-5-semialdehyde dehydrogenase  
 290 (EC:1.2.1.41); ProC, pyrroline-5-carboxylate reductase (EC:1.5.1.2). **(d)** Epifluorescence  
 291 microscopic analysis of *A. deanei* cell line co-expressing eGFP-OCD and mCherry-SKL.  
 292 Fluorescence channels are as in Fig. 2b,c. Scale bar: 5  $\mu$ m.

293

294 In sum, we identified seven ETPs in *A. deanei* representing a combination of typical  
 295 trypanosomatid proteins and proteins that evolved newly in *A. deanei* (or diverged beyond  
 296 recognition from their original source). Their discrete subcellular localizations within the  
 297 endosymbiont, as well as their functional annotations, suggests their involvement in distinct

298 biological processes. We postulate that, convergent to the evolution of the plastid division  
299 machinery, a dynamin and PG hydrolase-based host-derived division ring system evolved, that  
300 provides *A. deanei* with control over the division of its endosymbiont. Despite the apparent  
301 capacity of specific nucleus-encoded proteins (ETP3 and ETP8) to translocate across the  
302 endosymbiont membranes, cross-compartment linkage of metabolic pathways seems to rely  
303 rather on metabolite shuttling than protein import. Metabolic integration of the endosymbiont might  
304 be facilitated by the tight association of glycosomes that produce metabolites required by the  
305 endosymbiont. In conclusion, our work demonstrates that in addition to studying gene  
306 presence/absence patterns by genomics, analysis of symbiosis-induced protein re-localization, is  
307 key to understand the molecular mechanisms guiding endosymbiotic interactions. The results  
308 obtained strongly support the emerging pattern that protein import evolves early during  
309 endosymbiosis providing the host with control over the endosymbiont<sup>7</sup> and not as a consequence  
310 of EGT to enable re-import of the gene products of the transferred genes.

311

## 312 **Methods**

313 **Culture conditions and generation of transgenic cell lines.** *Angomonas deanei* (ATCC PRA-  
314 265) was grown as described before<sup>28</sup>. For transfection, between  $1 \times 10^6$  and  $1 \times 10^7$  cells were  
315 resuspended in 18  $\mu$ l of P3 primary cells solution (Lonza), 2  $\mu$ l of the restricted cassette (2-4  $\mu$ g  
316 total) were added, and cells were pulsed with the program FP-158 using the Nucleofector 4D  
317 (Lonza). After transfection, cells were transferred to 5 ml of fresh brain-heart infusion medium  
318 (BHI, Sigma Aldrich) supplemented with 10% v/v horse serum (Sigma Aldrich) and 10  $\mu$ g/ml of  
319 hemin, incubated at 28 °C for 6 h, and then diluted 10-fold in the same media containing the  
320 selection drug(s) (i.e., G418 at 500  $\mu$ g/ml, hygromycin B at 500  $\mu$ g/ml, and/or phleomycin at 100  
321  $\mu$ g/ml final concentration). Aliquots of 200  $\mu$ l were distributed onto 96-well plates and incubated  
322 at 28 °C until clonal cell lines were recovered, typically between 5-7 days. Correct insertion of the  
323 cassette was verified by PCR.

324 **Isolation of the endosymbiont of *A. deanei* and proteomic analysis.** Endosymbionts were  
325 isolated from *A. deanei* cells lysed by sonication on consecutive sucrose, percoll, and iodixanol  
326 gradient as described previously<sup>28</sup>. Finally, endosymbionts were resuspended in 200  $\mu$ l of buffer  
327 B (25 mM Tris-HCl, pH 7.5, 20 mM KCl, 2 mM EDTA, and 250 mM sucrose). The resulting  
328 endosymbiont fractions mainly consisted of intact endosymbionts as judged by the presence of a  
329 double membrane surrounding the endosymbionts viewed by TEM (**Fig. 1a-b**) and were thus

330 considered suitable for proteomic analyses. Proteins from isolated endosymbionts were either  
331 precipitated by addition of trichloroacetic acid (TCA) to a final concentration of 10% v/v, washed  
332 2x in cold acetone, and resuspended in 200  $\mu$ l 0.1 N NaOH (Experiment 1) or the isolated  
333 endosymbionts were directly frozen in liquid nitrogen and stored at -80 °C until use (Experiment  
334 2).

335 **Transmission electron microscopy.** Isolated endosymbionts obtained from the iodixanol  
336 gradient were fixed overnight in 2.5% glutaraldehyde in 0.1 M cacodylate buffer, pH 7.4 at 4 °C.  
337 Fixed endosymbionts were pelleted at 7,600 x *g* for 5 min and resuspended in buffer containing  
338 25 mM Tris-HCl, pH 7.5, 0.4 M sucrose, 20 mM potassium chloride, 2 mM  
339 ethylenediaminetetraacetic acid (EDTA), and 20% bovine serum albumin (BSA), incubated for 10  
340 min on ice, and pelleted again. The resulting pellet was covered with 2.5% glutaraldehyde in 0.1  
341 M cacodylate buffer taking care not to disrupt its integrity and fixed overnight at 4 °C. *A. deanei*  
342 cells grown to late exponential phase were washed twice with phosphate-buffered saline (PBS),  
343 fixed as described for isolated endosymbionts, and pelleted at 2,000 x *g* for 5 min. Pellets of fixed  
344 *A. deanei* cells and endosymbionts were washed once with 0.1 M cacodylate buffer, post-fixed  
345 with 2% osmium tetroxide plus 0.8% tetrasodium hexacyanoferrate, washed once more in 0.1 M  
346 cacodylate buffer, and embedded in 3.5% agar. Agar blocks containing the pellets were  
347 dehydrated by a graded series of ethanol from 60% to 100% and infiltrated with Epon-Aldarite  
348 using propylenoxide as an intermediate solvent. The resin was polymerized for 24 h at 40 °C and  
349 then 24 h at 60 °C. Thin sections of 70 nm were stained with lead citrate and uranyl acetate and  
350 examined with a transmission electron microscope (Zeiss 902) at 80 kV.

351 **Proteome analysis and identification of ETPs.** Sample separation and LC-MS/MS analyses of  
352 WC and ES samples were essentially done as described before<sup>28</sup>. In total, the results from 9  
353 biological replicates were analyzed. The first three biological replicates (Experiment 1) were run  
354 together in a preliminary analysis to check the quality of the endosymbiont preparation and  
355 differed from the later six biological replicates (Experiment 2) only by a TCA precipitation step of  
356 both the WC and ES samples. Peptides of tryptic digested samples were separated over 2h on  
357 C18 material using an Ultimate3000 rapid separation system (Thermo Fisher Scientific) as  
358 described<sup>61</sup> and subsequently analyzed with an online coupled mass spectrometer in data  
359 dependent mode. Samples of Experiment 1 were analyzed using a QExactive plus mass  
360 spectrometer (Thermo Fisher Scientific) as described<sup>61</sup> and samples of Experiment 2 analyzed  
361 on an Orbitrap Elite (Thermo Fisher Scientific) as described<sup>62</sup>.

362 Database searches were carried out with MaxQuant version 1.6.12.0 (MPI for  
363 Biochemistry, Planegg, Germany) using label-free quantification separately for the two analyzed  
364 groups (WC and ES) and standard parameters if not indicated otherwise. The ‘match between  
365 runs’ function was enabled, as well as LFQ and iBAQ<sup>63</sup> quantification; LFQ quantification was  
366 carried out separately for WC and ES samples. Protein sequences as basis for searches were  
367 retrieved from UniProtKB (750 sequence entries from *Ca. K. crithidii*, downloaded on 9<sup>th</sup> April  
368 2019) and NCBI (10365 entries from GCA\_903995115.1, *A. deanei*, downloaded on 1<sup>st</sup> December  
369 2020). The mass spectrometry proteomics data have been deposited to the ProteomeXchange  
370 Consortium via the PRIDE<sup>64</sup> partner repository with the dataset identifier [PXD017908](https://proteomecentral.proteomexchange.org/protein/PXD017908).

371 Only proteins identified with at least 3 (Experiment 1) or 5 (Experiment 2) valid iBAQ  
372 intensities<sup>65</sup>, 2 different peptides, and at least 5% sequence coverage were considered as  
373 identified with high confidence and used in downstream analyses. Next, iBAQ intensities were  
374 normalized by dividing through the median iBAQ intensity of all proteins from the respective  
375 sample. For determination of endosymbiont-encoded proteins enriched in the host cell, missing  
376 values were imputed with values drawn from a downshifted normal distribution (downshift of 1.8  
377 standard deviations, width 0.3 standard deviations) and two-sided Student’s t-test were  
378 calculated between normalized iBAQ values from WC and ES samples using the significance  
379 analysis of microarrays method<sup>66</sup> to control for multiple testing ( $S_0=0.6$ , false discovery rate 5%).

380 To verify correct prediction of translation start sites of each POI in the newly released,  
381 annotated *A. deanei* genome assembly (GCA\_903995115.1)<sup>67</sup> that was used as a database for  
382 mass spectrometric protein identification, the gene model of each POI was compared to the  
383 corresponding transcript in a previously generated *A. deanei* transcriptome dataset<sup>28</sup>. The longest  
384 possible N-terminal extension of the open reading frame (ORF) in 5’ full-length transcripts (as  
385 indicated by the presence of a 5’ splice leader sequence (SL)) was regarded as full-length ORF  
386 and used for further analyses (**Table S2, Supplementary Fig. 4**). Except for the hypothetical  
387 protein CAD2216283.1, all candidate ETPs were represented by transcripts with a full-length 5’  
388 end. For this candidate, 5’ RACE allowed for extension of the transcript sequence up to the SL.

389 **RNA extraction, cDNA synthesis, and rapid amplification of cDNA ends (RACE).** Cells from  
390 0.5 ml *A. deanei* cultures grown to late-logarithmic phase were collected by centrifugation, the  
391 pellet was frozen in liquid nitrogen and immediately resuspended in 1 ml of TRI Reagent (Sigma  
392 Aldrich). RNA was extracted according to the manufacturer’s instructions. RNA concentration was  
393 estimated by measuring the absorbance at 260 nm in a NanoDrop spectrophotometer (Thermo).  
394 5 U of DNAase (Thermo) were added to 5 µg RNA, incubated for 10 min at room temperature to

395 degrade residual DNA contamination, and DNase-treated RNA was purified using the RNase  
396 MinElute Kit (Qiagen) according to the manufacturer's instructions. 3  $\mu$ g of DNase-treated RNA  
397 were used per RACE reaction using the 5' RACE System for Rapid Amplification of cDNA Ends,  
398 version 2.0 (Thermo) with internal primers described in **Supplementary Table 3**. The obtained  
399 PCR fragments were cloned into the pJET 1.2 cloning vector (Invitrogen) and sequenced using  
400 the pJet Fw/Rv primer set provided by the manufacturer.

401 **Construction of plasmids.** To efficiently generate eGFP-POI and POI-eGFP expression vectors  
402 for *A. deanei*, the pAdea043 and pAdea235 tagging vectors, respectively, were constructed  
403 (**Supplementary Fig. 5**). These plasmids target the insertion of the respective expression  
404 cassettes into the  $\delta$ -amastin locus of *A. deanei*<sup>28</sup>. To this end, the *lacZ $\alpha$*  expression cassette  
405 encoding the alpha-fragment of the  $\beta$ -galactosidase under control of the lac promoter and  
406 operator was amplified from the circularized plasmid pGEM-T (Promega) using the forward primer  
407 596 that includes a 5' *XhoI* restriction site and the reverse primer 597 which includes a 3' *KpnI*  
408 restriction site. In parallel, large fragments containing the 3' flanking region (FR) of  $\delta$ -amastin, the  
409 pUMA1467 backbone<sup>68</sup>, the 5' FR of  $\delta$ -amastin, the neomycin resistance gene (*neo*), the  
410 glyceraldehyde 3-phosphate dehydrogenase intergenic region of *A. deanei* (GAPDH-IR), and  
411 eGFP were amplified from the plasmid pAEX-eGFP<sup>28</sup> using forward primers containing a 5' *KpnI*-  
412 *BsaI* extension and reverse primers containing a 3' *XhoI*-*BsaI* extension (598/599 for pAdea043  
413 and 763/764 for pAdea235). After restriction of the fragments with *XhoI* and *KpnI*, a total of 20-60  
414 fmol of each of the gel-purified *lacZ $\alpha$*  expression cassette and the 598/599 fragment or 763/764  
415 fragment were mixed and ligated with T4 DNA ligase to generate pAdea043 and pAdea235,  
416 respectively.

417 Then, each of the POI-encoding sequences were amplified from *A. deanei* gDNA with  
418 primers containing a *BsaI* recognition site followed by 4 nucleotides complementary to the  
419 pAdea043 insertion site for the N-terminal tagging or the pAdea235 insertion site for the C-  
420 terminal tagging with eGFP (**Supplementary Table 4**). The resulting PCR fragments were  
421 extracted from agarose gels and cloned into the tagging vectors by Golden Gate ligation<sup>69</sup> using  
422 equimolar or a 3:1 ratio (insert:tagging vector). In a few cases, the cloning strategy was modified,  
423 and vectors assembled by multi-fragment Golden Gate or Gibson assembly as indicated in  
424 **Supplementary Fig. 5**. *Escherichia coli* Top10 cells were transformed with the resulting vectors,  
425 transformants selected on LB agar plates containing 100  $\mu$ g/ml ampicillin, and 80  $\mu$ g/ml X-Gal  
426 and 0.5 mM IPTG for blue-white selection of successful ligation events if needed.

427 The plasmid pAdea119 containing a cassette to express ETP1 N-terminally tagged with  
428 mSCARLET from the  $\gamma$ -amastin locus<sup>28</sup> was generated from three fragments: the mSCARLET  
429 was amplified from vector p3615 (kindly provided by Michael Feldbrügge), *etp1* was amplified  
430 from *A. deanei* gDNA using the primer set 1087/1088, and a large fragment containing the  
431 pUMA1467 backbone, 1,000 bp of the 5'- and 3'-FR of the  $\gamma$ -amastin gene, the hygromycin  
432 resistance gene (*hyg*), and the GAPDH-IR was amplified from the plasmid pAdea021 which  
433 targets the  $\gamma$ -amastin locus for insertion and expression of mCHERRY, using the primer set  
434 1083/348 (**Supplementary Table 4**).

435 For generation of homozygous ETP1, ETP2, and ETP7 knock-out mutants, the plasmids  
436 pAdea148 and pAdea156 (containing replacement cassettes for ETP1), pAdea092, pAdea093,  
437 and pAdea094 (containing replacement cassettes for ETP2), and the plasmids pAdea102 and  
438 pAdea103 (containing replacement cassettes for ETP7) were constructed (**Supplementary Fig.**  
439 **5**). To this end, around 1-kbp 5' and 3'-FRs of the respective genes were amplified from *A. deanei*  
440 gDNA, *neo* was amplified from pAdea036, and *hyg* from pAdea004 (=pAdea  $\gamma$ -ama/Hyg<sup>28</sup>) using  
441 primers described in **Supplementary Table 4**. The phleomycin resistance genes (*phleo*) was  
442 synthesized by a commercial service (Integrate DNA Technologies, IDT). Vectors, carrying in the  
443 pUMA1467 backbone a replacement cassette, in which the ORF of the POI is replaced by a  
444 resistance gene, were assembled by Golden Gate ligation. The correct nucleotide sequence of  
445 expression cassettes of all plasmids generated was verified by sequencing.

446 **Bioinformatic analyses of the ETP amino acid sequences.** Similarity searches of the *A. deanei*  
447 ETPs against the NCBI nr protein sequence database were performed using Blastp<sup>70</sup>. Best  
448 bidirectional blast hits were obtained by blasting the best NCBI hit back against the *A. deanei*  
449 transcriptome dataset using Tblastn built-in Bioedit v. 7.0.5.3<sup>71</sup>. Predictions of transmembrane  
450 regions were obtained using TMHMM v. 2.0<sup>72</sup>, targeting signals using TargetP 2.0<sup>73</sup> and SignalP  
451 5.0<sup>74</sup>. 3D structure homology was analyzed with Phyre2<sup>46</sup> and disordered protein regions  
452 predicted with IUPred2A<sup>75</sup>. The multiple sequence alignment of OCD amino acid sequences was  
453 generated using ClustalX 2.1 and refined manually. Unambiguously alignable sequence blocks  
454 were extracted and used for phylogenetic analysis. OCD phylogeny was inferred by maximum  
455 likelihood analysis using PhyML v2.4.5<sup>76</sup> with the WAG+I+G+F model of amino acid sequence  
456 evolution (determined as most suitable with ProtTest v1.4 software<sup>77</sup>. The robustness of branches  
457 was tested by bootstrap analysis using 100 replicates.

458 **Fluorescence microscopy and 3D reconstruction of fluorescence signals in *A. deanei*.** 50  
459  $\mu$ l of *A. deanei* cultures grown to densities between 1-8 x 10<sup>7</sup> cells/ml were mixed 1:1 with PBS



460 containing 8% paraformaldehyde (PFA), incubated for 20 min at room temperature, washed twice  
461 with PBS and then, 20  $\mu$ l of the mixture was spotted on polylysine-coated glass slides. After 30  
462 min, slides were washed 3 times with PBS followed by incubation with 10  $\mu$ g/ml Hoechst 33342  
463 in PBS for 5 min. Slides were washed 2 more times, and finally samples were mounted in 9  $\mu$ l of  
464 Prolong Diamond (Thermo). Epiluminescence microscopy was carried out on an Axio imager M.1  
465 (Zeiss, Oberkochen, Germany) coupled to a Pursuit™ 1.4 MP Monochrome CCD camera  
466 (Diagnostic Instruments, Sterling Heights, MI, USA) and a halide lamp LQ-HXP 120 (LEJ, Jena,  
467 Germany) equipped with a custom set of filters for GFP (ET470/40x, T495LPXR, ET525/50m)  
468 and Rfp/mCherry (ET560/40x, T585lp, ET630/75m) (both: Chroma, Bellow Falls, VT, USA); and  
469 DAPI (447/60 BrightLine HC, HC BS 409, 387/11 BrightLine HC) (AHF Analysentechnik,  
470 Tuebingen, Germany). Images were acquired using a 100x Plan Neofluar NA 1.3 oil M27 objective  
471 (Zeiss) and processed using the Metamorph software package v. 7.7.4.0. Or an Axio Imager.A2  
472 (Zeiss) coupled to an AxioCam MRm (Zeiss) and an Illuminator HXP 120 V (Zeiss) equipped with  
473 Filter Set 38 HE: ET470/40, BS495, ET525/50; 43 HE: ET550/25, BS570, ET605/70; 49: ET365,  
474 BS395, ET445/50. Images were acquired using an EC Plan-Neofluar 100x/1.30 Oil Ph3 M27  
475 objective (Zeiss) and processed with Zen Blue v2.5 software. Confocal fluorescence microscopic  
476 analyses were performed on a Leica TCS SP8 STED 3X (Leica Microsystems, Wetzlar Germany)  
477 using 93x/1.3 glycerol objective equipped with a filter NF 488/561/633 with the following settings:  
478 unidirectional scan direction X, scan speed 400-1000 Hz, frame average 2, line accumulation 2  
479 without gain. The lasers used were a diode at 405 nm and WLL at 70%. The laser line was set  
480 for Hoechst 33342 at 8.6% (405 nm), eGFP at 10% (488 nm), and mSCARLET at 7.5% (561 nm).  
481 Emission was captured by PMT between 424 and 477 nm for the Hoechst 33342 signal; and  
482 hybrid detectors were set to capture emissions between 505 and 548 nm for eGFP and 589 and  
483 621 nm for mSCARLET. Images of both 2D and 3D representations were processed in the Leica  
484 X software v.3.5.2.18963 and deconvoluted on the Huygens Professional v. 16.10 on default  
485 confocal settings setting, except the manual mode threshold for background extraction was set  
486 based on the cytosolic background signal.

487 **Measurement of protein concentration, SDS-polyacrylamide gel electrophoresis (PAGE),**  
488 **and Western blot analysis.** Protein concentrations in the samples were determined using the  
489 Pierce 660 nm Protein Assay Reagent (Thermo Fisher Scientific) in 96-well plates by the  
490 absorbance in an Infinite M200 plate reader (TECAN, Austria GmbH). For SDS-PAGE, protein  
491 samples were mixed with 4X sample buffer (final concentration 63 mM Tris-HCl, pH 6.8, 10 mM  
492 dithiothreitol, 10% glycerol, 2% SDS, and 0.0025% bromophenol blue), incubated for 5 min at  
493 95 °C and 30  $\mu$ g of protein loaded onto Bolt™ 4-12% Bis-Tris Plus precast gels (Thermo Fisher

494 Scientific). Electrophoresis was performed at 180 V constant in 2-morpholin-4-ylethanesulfonic  
495 acid (MES)-SDS running buffer (50 mM MES, 50 mM Tris-HCl, pH 7.3, 0.1% SDS, and 1 mM  
496 ethylenediaminetetraacetic acid (EDTA). After electrophoresis, the gels were blotted onto  
497 polyvinylidene difluoride (PVDF) membranes (Amersham™ Hybond™, 0.45 nm, GE HealthCare  
498 Life Science) at 60 mA for 1 h. Membranes were blocked, incubated with a 1:1,000 dilution of  
499 mouse anti-GFP [B-2] (SantaCruz Biotechnology) or a rat anti-RFP [5F8] (Chromotek) followed  
500 by a 1:5,000 dilution of the horseradish peroxidase-conjugated secondary antibody against  
501 mouse IgG (7076, Cell Signaling Technology) or rat IgG (PA128573, Thermo Fisher Scientific),  
502 respectively, in a SNAP i.d.® 2.0 (Merck-Millipore) according to the manufacturer's instructions.  
503 Finally, membranes were covered in SuperSignal™ West Pico PLUS chemiluminescent substrate  
504 (Thermo Fisher Life Science) and chemiluminescence was detected using an ImageQuant LAS  
505 4000 (GE Healthcare Life Science) or a ChemiDoc MP Imaging System (Bio-Rad).

506

## 507 References

- 508 1 Motta, M. C. M. *et al.* The bacterium endosymbiont of *Crithidia deanei* undergoes coordinated  
509 division with the host cell nucleus. *PLoS ONE* **5**, e12415, doi:doi:10.1371/journal.pone.0012415  
510 (2010).
- 511 2 Alves, J. M. P. *et al.* Endosymbiosis in trypanosomatids: The genomic cooperation between  
512 bacterium and host in the synthesis of essential amino acids is heavily influenced by multiple  
513 horizontal gene transfers. *BMC Evol. Biol.* **13**, 190 (2013).
- 514 3 Alves, J. M. P. *et al.* Identification and phylogenetic analysis of heme synthesis genes in  
515 trypanosomatids and their bacterial endosymbionts. *PLoS ONE* **6**, e23518 (2011).
- 516 4 Camargo, E. P. & Freymuller, E. Endosymbiont as supplier of ornithine carbamoyltransferase in a  
517 trypanosomatid. *Nature* **270**, 52-53, doi:10.1038/270052a0 (1977).
- 518 5 Mundim, M. H. & Roitman, I. Extra nutritional requirements of artificially aposymbiotic *Crithidia*  
519 *deanei*. *Journal of Protozoology* **24**, 329-331 (1977).
- 520 6 Dubilier, N., Bergin, C. & Lott, C. Symbiotic diversity in marine animals: the art of harnessing  
521 chemosynthesis. *Nat. Rev. Microbiol.* **6**, 725-740 (2008).
- 522 7 Husnik, F. *et al.* Bacterial and archaeal symbioses with protists. *Curr. Biol.* **31**, R862-R877,  
523 doi:10.1016/j.cub.2021.05.049 (2021).
- 524 8 Moya, A., Peretó, J., Gil, R. & Latorre, A. Learning how to live together: genomic insights into  
525 prokaryote-animal symbioses. *Nat. Rev. Genet.* **9**, 218-229, doi:10.1038/nrg2319 (2008).
- 526 9 Brum, F. L. *et al.* Structural characterization of the cell division cycle in *Strigomonas culicis*, an  
527 endosymbiont-bearing trypanosomatid. *Microscopy and Microanalysis* **20**, 228-237,  
528 doi:10.1017/s1431927613013925 (2014).
- 529 10 Nowack, E. C. M. & Melkonian, M. Endosymbiotic associations within protists. *Philosophical*  
530 *Transactions of the Royal Society B: Biological Sciences* **365**, 699-712 (2010).
- 531 11 McCutcheon, J. P. The bacterial essence of tiny symbiont genomes. *Curr. Opin. Microbiol.* **13**, 73-  
532 78 (2010).

- 533 12 Nowack, E. C. M. & Weber, A. P. M. in *Annual Review of Plant Biology, Vol 69* Vol. 69 *Annual*  
534 *Review of Plant Biology* (ed S. S. Merchant) 51-84 2018.
- 535 13 Husnik, F. *et al.* Horizontal gene transfer from diverse bacteria to an insect genome enables a  
536 tripartite nested mealybug symbiosis. *Cell* **153**, 1567-1578 (2013).
- 537 14 Luan, J. B. *et al.* Metabolic coevolution in the bacterial symbiosis of whiteflies and related plant  
538 sap-feeding insects. *Genome Biology and Evolution* **7**, 2635-2647, doi:10.1093/gbe/evv170 (2015).
- 539 15 Nowack, E. C. M. *et al.* Gene transfers from diverse bacteria compensate for reductive genome  
540 evolution in the chromatophore of *Paulinella chromatophora*. *Proc. Natl. Acad. Sci. USA* **113**,  
541 12214-12219 (2016).
- 542 16 Sloan, D. B. *et al.* Parallel histories of horizontal gene transfer facilitated extreme reduction of  
543 endosymbiont genomes in sap-feeding insects. *Mol Biol Evol* **31**, 857-871 (2014).
- 544 17 Nowack, E. C. M. *Paulinella chromatophora* - rethinking the transition from endosymbiont to  
545 organelle *Acta Societatis Botanicorum Poloniae* **83**, 387-397,  
546 doi:<http://dx.doi.org/10.5586/asbp.2014.049> (2014).
- 547 18 Singer, A. *et al.* Massive protein import into the early evolutionary stage photosynthetic organelle  
548 of the amoeba *Paulinella chromatophora*. *Curr. Biol.* **27**, 2763-2773 (2017).
- 549 19 Bublitz, D. C. *et al.* Peptidoglycan production by an insect-bacterial mosaic. *Cell* **179**, 703-712,  
550 doi:10.1016/j.cell.2019.08.054 (2019).
- 551 20 Login, F. H. *et al.* Antimicrobial peptides keep insect endosymbionts under control. *Science* **334**,  
552 362-365 (2011).
- 553 21 Nakabachi, A., Ishida, K., Hongoh, Y., Ohkuma, M. & Miyagishima, S. Y. Aphid gene of bacterial  
554 origin encodes a protein transported to an obligate endosymbiont. *Curr. Biol.* **24**, R640-R641  
555 (2014).
- 556 22 Motta, M. C. M. Endosymbiosis in trypanosomatids as a model to study cell evolution. *Open*  
557 *Parasitology Journal* **4**, 139-147 (2010).
- 558 23 Votýpka, J. *et al.* *Kentomonas* gen. n., a new genus of endosymbiont-containing trypanosomatids  
559 of Strigomonadinae subfam. n. *Protist* **165**, 825-838, doi:10.1016/j.protis.2014.09.002 (2014).
- 560 24 Teixeira, M. M. G. *et al.* Phylogenetic validation of the genera *Angomonas* and *Strigomonas* of  
561 trypanosomatids harboring bacterial endosymbionts with the description of new species of  
562 trypanosomatids and of proteobacterial symbionts. *Protist* **162**, 503-524 (2011).
- 563 25 Motta, M. C. M., Leal, L. H. M., DeSouza, W., DeAlmeida, D. F. & Ferreira, L. C. S. Detection of  
564 penicillin-binding proteins in the endosymbiont of the trypanosomatid *Crithidia deanei*. *J.*  
565 *Eukaryot. Microbiol.* **44**, 492-496, doi:10.1111/j.1550-7408.1997.tb05729.x (1997).
- 566 26 Alves, J. M. P. *et al.* Genome evolution and phylogenomic analysis of *Candidatus*  
567 Kinetoplastibacterium, the betaproteobacterial endosymbionts of *Strigomonas* and *Angomonas*.  
568 *Genome Biology and Evolution* **5**, 338-350, doi:10.1093/gbe/evt012 (2013).
- 569 27 Klein, C. C. *et al.* Biosynthesis of vitamins and cofactors in bacterium-harboring trypanosomatids  
570 depends on the symbiotic association as revealed by genomic analyses. *PLoS ONE* **8**,  
571 doi:10.1371/journal.pone.0079786 (2013).
- 572 28 Morales, J. *et al.* Development of a toolbox to dissect host-endosymbiont interactions and protein  
573 trafficking in the trypanosomatid *Angomonas deanei*. *BMC Evol. Biol.* **16**, 247, doi:DOI  
574 10.1186/s12862-016-0820-z (2016).
- 575 29 He, C. Y. *et al.* Golgi duplication in *Trypanosoma brucei*. *J. Cell Biol.* **165**, 313-321,  
576 doi:10.1083/jcb.200311076 (2004).
- 577 30 Sahin, A. *et al.* The *Leishmania* ARL-1 and Golgi traffic. *PLoS ONE* **3**,  
578 doi:10.1371/journal.pone.0001620 (2008).

- 579 31 Nowack, E. C. M. & Grossman, A. R. Trafficking of protein into the recently established  
580 photosynthetic organelles of *Paulinella chromatophora*. *Proc. Natl. Acad. Sci. USA* **109**, 5340-5345,  
581 doi:10.1073/pnas.1118800109 (2012).
- 582 32 Shigenobu, S. & Stern, D. L. Aphids evolved novel secreted proteins for symbiosis with bacterial  
583 endosymbiont. *Proc. R. Soc. Lond. Ser. B-Biol. Sci.* **280**, 20121952 (2012).
- 584 33 van de Velde, W. *et al.* Plant peptides govern terminal differentiation of bacteria in symbiosis.  
585 *Science* **327**, 1122-1126 (2010).
- 586 34 Chang, K. P. Ultrastructure of symbiotic bacteria in normal and antibiotic treated *Blastocrithidia*  
587 *culicis* and *Crithidia oncopelti*. *Journal of Protozoology* **21**, 699-707 (1974).
- 588 35 Bailey, T. L. & Elkan, C. Fitting a mixture model by expectation maximization to discover motifs in  
589 biopolymers. *Proceedings / ... International Conference on Intelligent Systems for Molecular*  
590 *Biology ; ISMB. International Conference on Intelligent Systems for Molecular Biology* **2**, 28-36  
591 (1994).
- 592 36 Adams, D. W. & Errington, J. Bacterial cell division: Assembly, maintenance and disassembly of  
593 the Z ring. *Nat. Rev. Microbiol.* **7**, 642-653, doi:10.1038/nrmicro2198 (2009).
- 594 37 Motta, M. C. M. *et al.* The microtubule analog protein, FtsZ, in the endosymbiont of  
595 Trypanosomatid protozoa. *J. Eukaryot. Microbiol.* **51**, 394-401, doi:10.1111/j.1550-  
596 7408.2004.tb00386.x (2004).
- 597 38 Catta-Preta, C. M. C. *et al.* Endosymbiosis in trypanosomatid protozoa: the bacterium division is  
598 controlled during the host cell cycle. *Frontiers in Microbiology* **6**, doi:10.3389/fmicb.2015.00520  
599 (2015).
- 600 39 Sinha, S. & Manoj, N. Molecular evolution of proteins mediating mitochondrial fission–fusion  
601 dynamics. *FEBS Lett.* **593**, 703-718, doi:10.1002/1873-3468.13356 (2019).
- 602 40 Ingerman, E. *et al.* Dnm1 forms spirals that are structurally tailored to fit mitochondria. *J. Cell Biol.*  
603 **170**, 1021-1027, doi:10.1083/jcb.200506078 (2005).
- 604 41 Kalia, R. *et al.* Structural basis of mitochondrial receptor binding and constriction by DRP1. *Nature*  
605 **558**, 401-405, doi:10.1038/s41586-018-0211-2 (2018).
- 606 42 Chanez, A.-L., Hehl, A. B., Engstler, M. & Schneider, A. Ablation of the single dynamin of *T. brucei*  
607 blocks mitochondrial fission and endocytosis and leads to a precise cytokinesis arrest. *J. Cell Sci.*  
608 **119**, 2968-2974, doi:10.1074/jbc.M312178200 (2006).
- 609 43 Morgan, G. W., Goulding, D. & Field, M. C. The single dynamin-like protein of *Trypanosoma brucei*  
610 regulates mitochondrial division and is not required for endocytosis. *J. Biol. Chem.* **279**, 10692-  
611 10701, doi:10.1074/jbc.M312178200 (2004).
- 612 44 Miyagishima, S. Y., Kuwayama, H., Urushihara, H. & Nakanishi, H. Evolutionary linkage between  
613 eukaryotic cytokinesis and chloroplast division by dynamin proteins. *Proc. Natl. Acad. Sci. U. S. A.*  
614 **105**, 15202-15207, doi:10.1073/pnas.0802412105 (2008).
- 615 45 Yoshida, Y., Miyagishima, S. Y., Kuroiwa, H. & Kuroiwa, T. The plastid-dividing machinery:  
616 Formation, constriction and fission. *Curr. Opin. Plant Biol.* **15**, 714-721,  
617 doi:10.1016/j.pbi.2012.07.002 (2012).
- 618 46 Kelley, L. A., Mezulis, S., Yates, C. M., Wass, M. N. & Sternberg, M. J. E. The Phyre2 web portal for  
619 protein modeling, prediction and analysis. *Nat. Protoc.* **10**, 845-858, doi:10.1038/nprot.2015.053  
620 (2015).
- 621 47 Xiang, Y. *et al.* Crystal and cryoEM structural studies of a cell wall degrading enzyme in the  
622 bacteriophage phi 29 tail. *Proc. Natl. Acad. Sci. U. S. A.* **105**, 9552-9557,  
623 doi:10.1073/pnas.0803787105 (2008).
- 624 48 Miyagishima, S. Y., Kabeya, Y., Sugita, C., Sugita, M. & Fujiwara, T. DipM is required for  
625 peptidoglycan hydrolysis during chloroplast division. *BMC Plant Biology* **14**, 57, doi:10.1186/1471-  
626 2229-14-57 (2014).

- 627 49 Osteryoung, K. W. & Pyke, K. A. in *Annu. Rev. Plant Biol.* Vol. 65 443-472 (2014).
- 628 50 Voleman, L. & Doležal, P. Mitochondrial dynamics in parasitic protists. *PLoS Pathogens* **15**,  
629 doi:10.1371/journal.ppat.1008008 (2019).
- 630 51 Miyagishima, S. Y. A handshake across membranes. *Nature Plants* **3**, doi:10.1038/nplants.2017.25  
631 (2017).
- 632 52 Stebeck, C. E. *et al.* Kinetoplastid membrane protein-11 (KMP-11) is differentially expressed  
633 during the life-cycle of african trypanosomes and is found in a wide variety of kinetoplastid  
634 parasites. *Molecular and Biochemical Parasitology* **71**, 1-13, doi:10.1016/0166-6851(95)00022-s  
635 (1995).
- 636 53 Berberich, C. *et al.* The expression of the *Leishmania infantum* KMP-11 protein is developmentally  
637 regulated and stage specific. *Biochimica Et Biophysica Acta-Genes Structure and Expression* **1442**,  
638 230-237, doi:10.1016/s0167-4781(98)00176-6 (1998).
- 639 54 Finkelsztain, E. J. *et al.* Altering the motility of *Trypanosoma cruzi* with rabbit polyclonal anti-  
640 peptide antibodies reduces infection to susceptible mammalian cells. *Experimental Parasitology*  
641 **150**, 36-43, doi:10.1016/j.exppara.2015.01.007 (2015).
- 642 55 Li, Z. Y. *et al.* Identification of a novel chromosomal passenger complex and its unique localization  
643 during cytokinesis in *Trypanosoma brucei*. *PLoS ONE* **3**, doi:10.1371/journal.pone.0002354 (2008).
- 644 56 Li, Z. & Wang, C. C. KMP-11, a basal body and flagellar protein, is required for cell division in  
645 *Trypanosoma brucei*. *Eukaryot. Cell* **7**, 1941-1950, doi:10.1128/EC.00249-08 (2008).
- 646 57 Lim, L. Z. *et al.* Kinetoplastid membrane protein-11 adopts a four-helix bundle fold in DPC micelle.  
647 *FEBS Lett.* **591**, 3793-3804, doi:10.1002/1873-3468.12891 (2017).
- 648 58 Lacomble, S. *et al.* Basal body movements orchestrate membrane organelle division and cell  
649 morphogenesis in *Trypanosoma brucei*. *J. Cell Sci.* **123**, 2884-2891, doi:10.1242/jcs.074161 (2010).
- 650 59 Schneider, A. & Ochsenreiter, T. Failure is not an option - mitochondrial genome segregation in  
651 trypanosomes. *J. Cell Sci.* **131**, doi:10.1242/jcs.221820 (2018).
- 652 60 Loyola-Machado, A. C. *et al.* The symbiotic bacterium fuels the energy metabolism of the host  
653 trypanosomatid *Strigomonas culicis*. *Protist* **168**, 253-269, doi:10.1016/j.protis.2017.02.001  
654 (2017).
- 655 61 Grube, L. *et al.* Mining the secretome of C2C12 muscle cells: Data dependent experimental  
656 approach to analyze protein secretion using label free quantification and peptide based analysis.  
657 *J. Proteome Res.* **17**, 879-890, doi:10.1021/acs.jproteome.7b00684 (2018).
- 658 62 Preisner, H. *et al.* The cytoskeleton of parabasalian parasites comprises proteins that share  
659 properties common to intermediate filament proteins. *Protist* **167**, 526-543,  
660 doi:10.1016/j.protis.2016.09.001 (2016).
- 661 63 Schwanhauser, B. *et al.* Global quantification of mammalian gene expression control. *Nature* **473**,  
662 337-342, doi:10.1038/nature10098 (2011).
- 663 64 Perez-Riverol, Y. *et al.* The PRIDE database and related tools and resources in 2019: Improving  
664 support for quantification data. *Nucleic Acids Res.* **47**, D442-D450, doi:10.1093/nar/gky1106  
665 (2019).
- 666 65 Cox, J. *et al.* Accurate proteome-wide label-free quantification by delayed normalization and  
667 maximal peptide ratio extraction, termed MaxLFQ. *Mol. Cell. Proteomics* **13**, 2513-2526,  
668 doi:10.1074/mcp.M113.031591 (2014).
- 669 66 Tusher, V. G., Tibshirani, R. & Chu, G. Significance analysis of microarrays applied to the ionizing  
670 radiation response. *Proc Natl Acad Sci U S A* **98**, 5116-5121, doi:10.1073/pnas.091062498 (2001).
- 671 67 Davey, J. W. *et al.* Chromosomal assembly of the nuclear genome of the endosymbiont-bearing  
672 trypanosomatid *Angomonas deanei*. *G3 Genes/Genomes/Genetics* **11**, jkaa018, doi:DOI:  
673 10.1093/g3journal/jkaa018 (2021).

- 674 68 Terfrüchte, M. *et al.* Establishing a versatile Golden Gate cloning system for genetic engineering  
675 in fungi. *Fungal Genetics and Biology* **62**, 1-10, doi:10.1016/j.fgb.2013.10.012 (2014).
- 676 69 Engler, C., Kandzia, R. & Marillonnet, S. A one pot, one step, precision cloning method with high  
677 throughput capability. *PLoS ONE* **3**, doi:10.1371/journal.pone.0003647 (2008).
- 678 70 Altschul, S. F. *et al.* Protein database searches using compositionally adjusted substitution  
679 matrices. *Febs J.* **272**, 5101-5109, doi:10.1111/j.1742-4658.2005.04945.x (2005).
- 680 71 Hall, T. A. BioEdit: a user-friendly biological sequence alignment editor and analysis program for  
681 Windows 95/98/NT. *Nucleic Acids Symposium Series* **41**, 95-98 (1999).
- 682 72 Krogh, A., Larsson, B., von Heijne, G. & Sonnhammer, E. L. L. Predicting transmembrane protein  
683 topology with a hidden Markov model: Application to complete genomes. *J. Mol. Biol.* **305**, 567-  
684 580, doi:10.1006/jmbi.2000.4315 (2001).
- 685 73 Almagro Armenteros, J. J. *et al.* Detecting sequence signals in targeting peptides using deep  
686 learning. *Life Science Alliance* **2**, e201900429, doi:10.26508/lsa.201900429 (2019).
- 687 74 Armenteros, J. J. A. *et al.* SignalP 5.0 improves signal peptide predictions using deep neural  
688 networks. *Nat. Biotechnol.* **37**, 420+, doi:10.1038/s41587-019-0036-z (2019).
- 689 75 Erdős, G. & Dosztányi, Z. Analyzing protein disorder with IUPred2A. *Current Protocols in*  
690 *Bioinformatics* **70**, doi:10.1002/cpbi.99 (2020).
- 691 76 Guindon, S. & Gascuel, O. A simple, fast, and accurate algorithm to estimate large phylogenies by  
692 maximum likelihood. *Syst. Biol.* **52**, 696-704 (2003).
- 693 77 Abascal, F., Zardoya, R. & Posada, D. ProtTest: selection of best-fit models of protein evolution.  
694 *Bioinformatics* **21**, 2104-2105 (2005).

695

## 696 **Acknowledgements**

697 This study was supported by Deutsche Forschungsgemeinschaft grant NO 1090/1-1 (to E.C.M.N.).  
698 The authors acknowledge scientific and technical assistance of the Center for Advance Imaging  
699 (CAi) at Heinrich Heine University Düsseldorf.

700

## 701 **Author contributions**

702 E.C.M.N., J.M., and G.E. designed the research. J.M., G.E., G.P., T.R., L.K., D.Z., R.W., D.K.,  
703 and M.K. performed the research. J.M., G.P., and E.C.M.N. analyzed the data. E.N. and K.S.  
704 supervised the research. J.M. and E.C.M.N. wrote the manuscript.

705

## 706 **Competing Interests statement**

707 The authors declare no competing interests.

708

709 **Data Availability Statement**

710 The accession number for the proteome data reported in this study is: PRIDE Archive  
711 (<https://www.ebi.ac.uk/pride/archive/>), accession number [PXD017908](#). Plasmids and strains  
712 generated in this study are available upon request from the authors.
